# Supplementary material for: The mechanism of NaFePO4 (de)sodiation determined by in situ X-ray diffraction
Source: Royal Society of Chemistry journal article supplement (doi:10.1039/c4cp01089b), 2014-01-01

# The mechanism of $\text{NaFePO}_4$ (de)sodiation determined by in situ X-ray diffraction

Montserrat Galceran<sup>a</sup>, Damien Saurel<sup>a</sup>, Begoña Acebedo<sup>a</sup>, Vladimir Roddatis<sup>a</sup>, Egoitz Martin<sup>a</sup>, Teófilo Rojo<sup>a,b</sup>, Montse Casas-Cabanas<sup>\*a</sup>

## Supplementary information

Figures 1-3 illustrate the evolution of the in situ XRD patterns along the in situ experiment. Each of the figures corresponds to a different region, here divided as a function of the number of phases used in Le-Bail fits. Selected examples of the latter are shown in each case: experimental pattern (dotted curve), refined profile (continuous line), difference curve below and Bragg positions (vertical bars).

Figure 1.

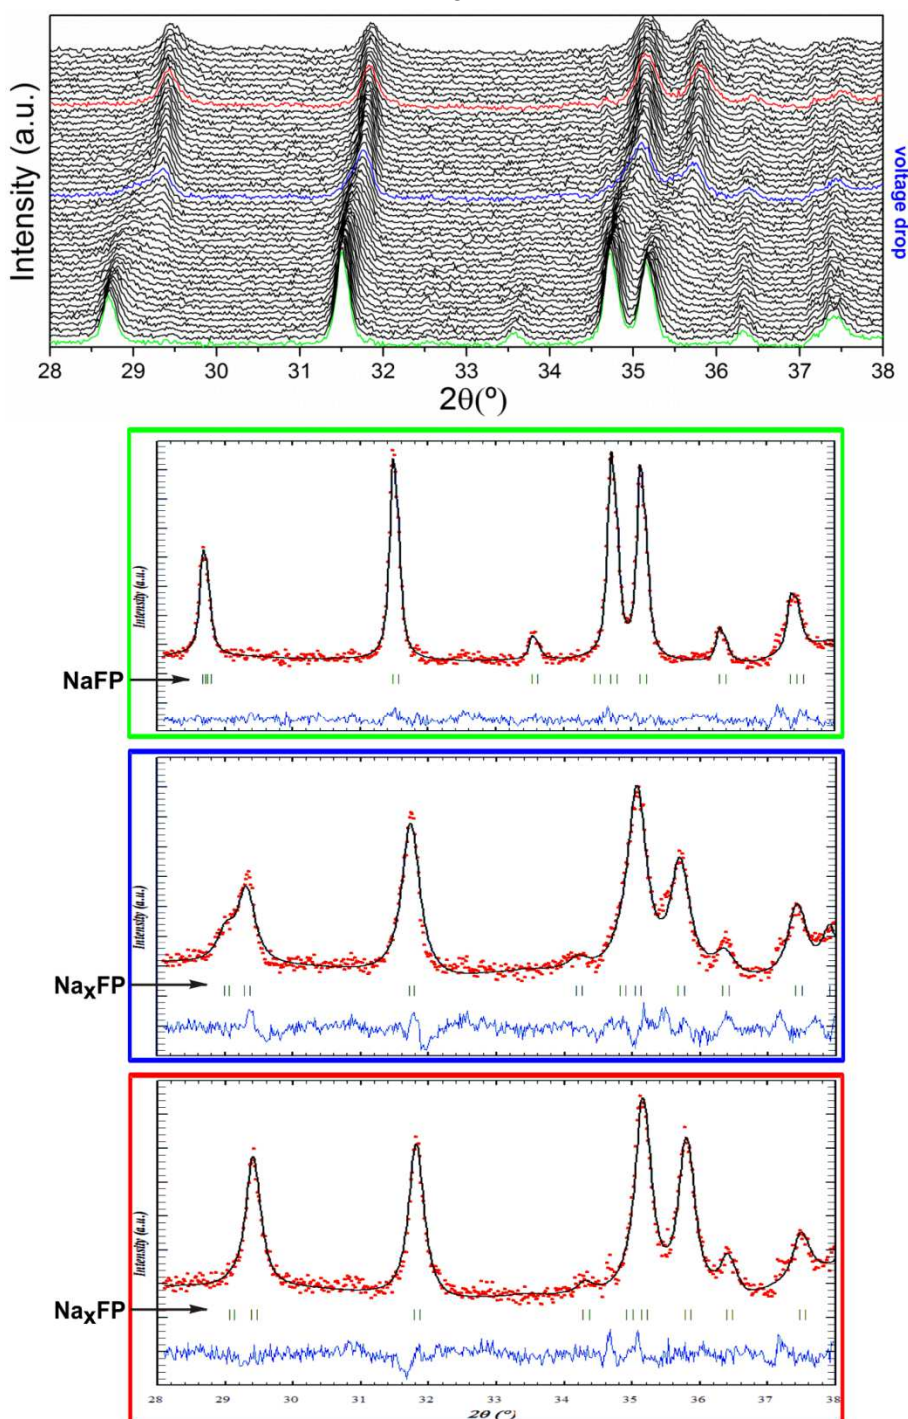

Figure 2.

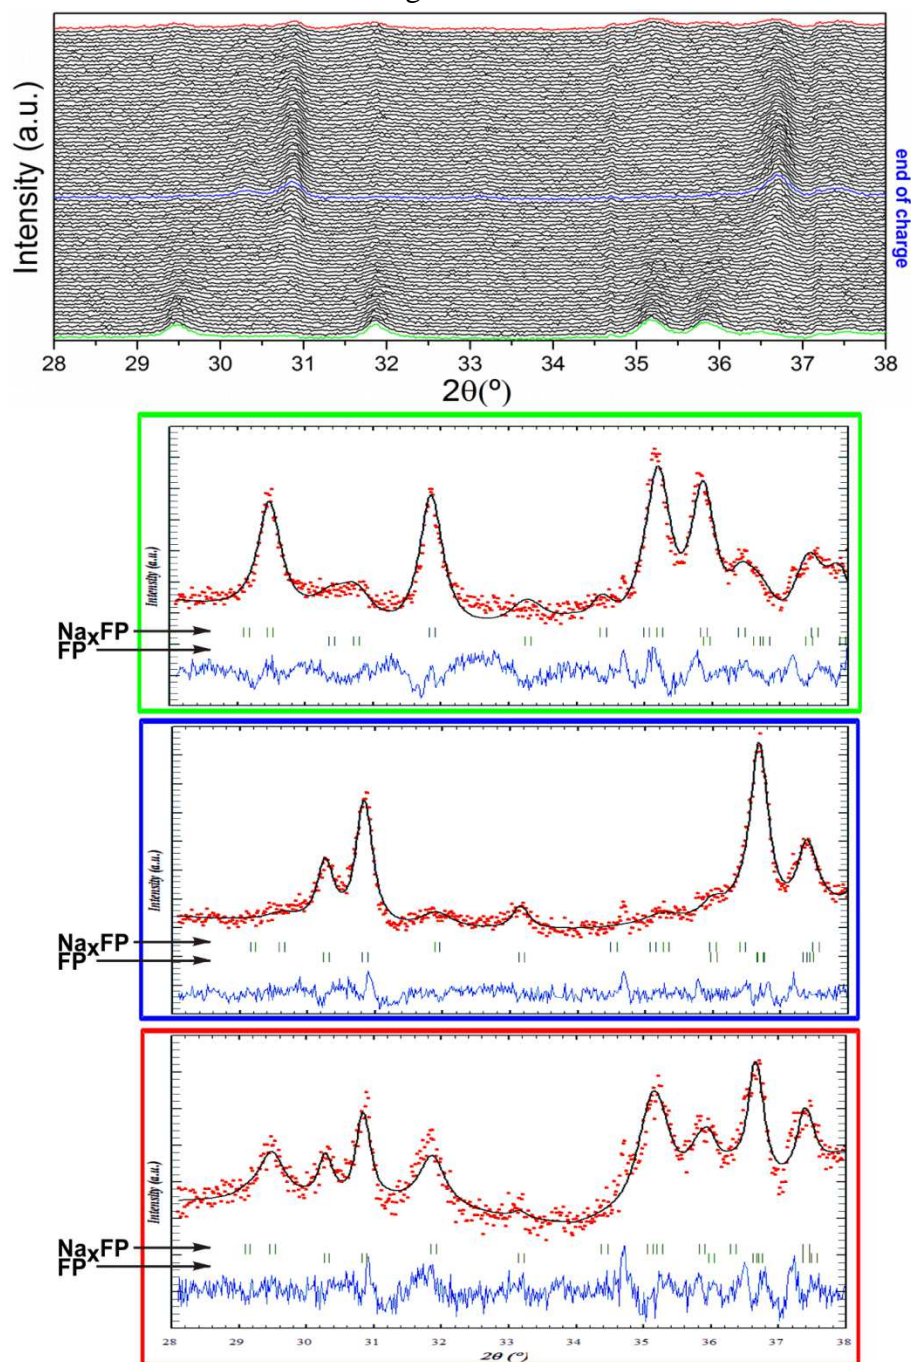

Figure 3.

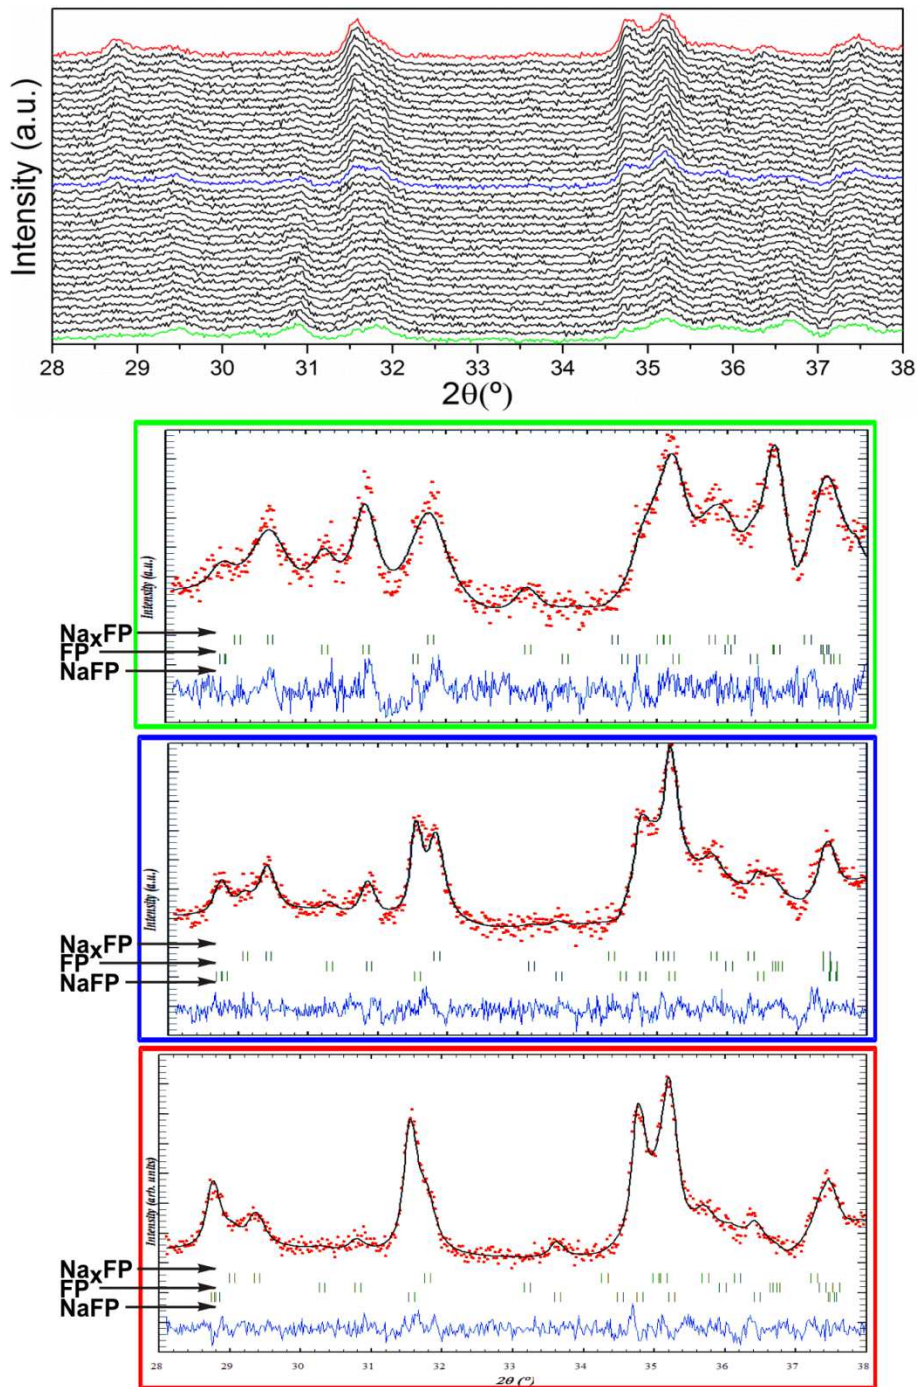

Supplement: c4cp01089b1.pdf [file c4cp01089b1.pdf]
